# Supplementary material
Source: PubMed Central journal article supplement (PMC5924912)
Supplement: pnas.201720529SI.pdf [file pnas.201720529SI.pdf]

# Supporting Information

Canfield et al. 10.1073/pnas.1720529115

## SI Materials and Methods

**Sample Collection.** All samples for geochemical analysis were obtained from fresh drill core, where drilling was conducted with fresh water as the drilling fluid to minimize contamination (see also ref. 1). As mentioned in the main text, Xiamaling unit 5 was intercepted in two cores. In one, the very top was cored, and this was used for high-resolution  $\mu$ XRF scanning as explored immediately below. In a second core, ~45 m of Xiamaling Formation unit 5 was recovered, and this was used for the rest of our geochemical analyses.

**High-Resolution XRF Core Scanning.** One of our cores intercepted the top of the unit 5 IF equivalent to a depth of 356 m in our stratigraphy (Fig. 2). A 70-cm-long Fe-rich section of this IF was analyzed by using an ITRAX  $\mu$ XRF core scanner (COX Analytical Systems 2011). This nondestructive analysis provided X-radiographic and optical images at high resolution (see further details in ref. 2) (Fig. S2). Before analysis, one side of the split core was lightly polished, and its smooth surface was cleaned with alcohol. The XRF core scanner was used in combination with a 2.2-kW rhodium (Rh) tube operating at 30 kV and 50 mA. The measurements were acquired at 100- $\mu$ m increments with an exposure time of 20 s, yielding 7,000 data points for the section. XRF raw data are expressed as element intensities in photon counts and require definition of the elements for semiquantitative evaluation (2). Within the XRF spectra, individual element peaks were extracted by using the Q-spec software from COX Analytical Systems, and the conversion of photon counts to concentrations was calibrated through certified reference materials (USGS SGR-1 and MAG-1) that reproduced  $\text{Fe}_2\text{O}_3$  and MnO to within 2% and 12% uncertainty, respectively (2). Peak fitting was validated by multiple data points, with an average mean square error of <2.0%. Still, errors may arise in both the calibration (based on SGR-1) and peak discrimination, and the results are considered as semiquantitative. Still, the contents of Fe (wt%) and Mn (wt%) measured from  $\mu$ XRF (Fig. S2) are comparable to those in samples at 355–357 m determined with traditional sample preparation and XRF analysis (also described below and shown in Fig. 4).

**Major Elements and Trace Metals.** Fresh core samples were collected and crushed to powders with a diameter of <75  $\mu$ m. Samples were analyzed for major elements with  $\mu$ XRF (PW2404; Philips Electronics) at the Key Laboratory of Petroleum Geochemistry (KLPG) in China as described (1, 3). The relative SD (RSD) was <1.0% for the elements reported.

Trace metal concentrations were determined with an inductively coupled plasma mass spectrometer (Finnigan MAT, Element I) following the procedures described in refs. 1 and 3. Trace metal concentrations were quantified by using calibration solutions containing the elements of interest (Mo and V), and the RSD of each trace metal was <1.5%. Accuracies were also tested with the shale standard (GBW 03014) that was measured along with the samples. The concentrations of the elements of interest (Mo and V) were within 10% of their reported values.

**XRD Analysis.** XRD analysis was performed at the University of Southern Denmark with a Rigaku MiniFlex X-ray diffractometer using a 600 W Cu- $\alpha$  source. Data were acquired through measurements of 10° per min over a range from 10° to 70° and analyzed in the PDXL Software, using the Inorganic Crystal

Structure Database. Examples of XRD spectra for a high Fe sample before and after acid treatment is shown in Fig. S3.

**TOC Determination.** Samples for TOC concentration were measured in two ways. For samples containing >10 wt% Fe, TOC was determined with a LECO CS-230HC carbon–sulfur analyzer. For this analysis, between 0.100 and 1.000 g of dry powders were precisely weighed and transferred into porcelain crucibles. After this, 0.5 mL of 1.5 M HCl was added to each sample and left on a hotplate to react for 2 h. Then, the samples were heated to a temperature <80 °C, while 1.5 M hydrochloric acid was added dropwise until the sample did not further react. After this, the crucibles were placed on the filter pump and then rinsed with distilled water to remove the acid solution. Then, the samples were placed in the metal crucible holder and then dried to constant weight in the oven at 70–80 °C. Finally, 1.000 g of iron flux and 1.000 g of wolfram flux were added to each sample, and TOC values were determined according to the operation method of the LECO CS-230HC carbon–sulfur analyzer. The RSDs of TOC values were <2.0%.

For samples with <10 wt% Fe, TOC was determined through our Rock Eval analysis as explained below. We found that when samples contained above ~10 wt% Fe, decomposition of siderite interfered with the Rock Eval TOC determination (Fig. S6), prompting our use of the more traditional LECO combustion method for these samples as described just above.

**Rock Eval.** Rock pyrolysis was performed at the KLPG by using Rock-Eval (Version 6) under a nitrogen atmosphere. Pyrolysis was performed under programmed heating from 300 °C to 650 °C at a rate of 25 °C/min. The first released hydrocarbons comprised the so-called S1 peak (thermo-vaporized free hydrocarbons). The next hydrocarbons were released during thermal cracking, and these comprised the S2 peak. Both the S1 and S2 peaks were measured with a flame ionization detector. The S3 peak comprised the CO and CO<sub>2</sub> liberated during the thermal cracking of the kerogen, and these were measured with an infrared (IR) cell. A final oxidation step with oxygen at 800 °C yielded the residual carbon (RC), determined as CO<sub>2</sub> liberated and measured by IR detection. The data were recorded and interpreted with the complementary software ROCKINT. Pyrolysis and oxidation curves of CO<sub>2</sub> were used to calculate the amounts of pyrolyzed carbon (PC; from S1, S2, and S3 peaks) and RC (4). TOC (wt%) was the sum of PC and RC. The instrument was calibrated by using the standard material [GBW (E) 070038a] with RSDs of S2 values <5.0%. Measured TOC data with Rock Eval (Version 6) are shown in Fig. 5 and Table S1.

HI was calculated as  $\text{S2}(\text{mg/g}) \times 100/\text{TOC}(\text{wt}\%)$ . As noted above (see also Fig. S6), we found that TOC concentrations from Rock Eval were inaccurate with total Fe concentration >10 wt%. Therefore, in calculating HI, we used Rock Eval TOC results for sediments with total Fe of <10 wt% and standard combustion after decarbonation with a LECO C-S analyzer (as explored above) for total Fe > 10 wt%.

**Kerogen Extraction and Stable Isotope Analysis.** Pure kerogen was extracted from several samples through HCl and HF treatment as fully described in ref. 3. The organic carbon isotopes ( $\delta^{13}\text{C}_{\text{kerogen}}$ ) and nitrogen isotopes ( $\delta^{15}\text{N}_{\text{kerogen}}$ ) were measured on the extracted kerogens by using a Flush EA 1112 HT O/H-N/C combined with a Delta V Advantage mass spectrometer (Thermo Scientific). The mass spectrometer was standardized with

NBS-18 ( $\delta^{13}\text{C} = -5.014\text{‰}$ ) and Chinese standards GBW04405 ( $\delta^{13}\text{C} = 0.57\text{‰}$ ) and GBW04407 ( $\delta^{13}\text{C} = -22.4\text{‰}$ ) with a RSD of 0.2‰ based on replicate standard analysis. Carbon isotope values were reported relative to the Vienna Pee Dee Belemnite (VPDB). Values of kerogen  $\delta^{15}\text{N}$  were determined during the same combustion as for the kerogen  $\delta^{13}\text{C}$ . The mass spectrometer was calibrated against reference standard IAEA-N-1 (with a  $\delta^{15}\text{N}$  value of 0.538‰) and NBS-14 (with  $\delta^{15}\text{N}$  value of 0.00‰), with  $\delta^{15}\text{N}$  values reported relative to air. The SD of  $\delta^{15}\text{N}$  was estimated at 0.2‰ based on replicate standard determination.

For the determination of carbonate  $\delta^{13}\text{C}$  and  $\delta^{18}\text{O}$ , ~20 mg of rock powder were weighed and reacted with phosphoric acid in an online carbonate preparation device. This device was connected to a Finnigan Mat-252 mass spectrometer (Thermo Scientific), where the  $\delta^{13}\text{C}$  and  $\delta^{18}\text{O}$  were determined. The  $\delta^{13}\text{C}$  and  $\delta^{18}\text{O}$  were standardized with carbonate materials GBW04405 (with a  $\delta^{13}\text{C}$  value of 0.57‰ and a  $\delta^{18}\text{O}$  value of -8.49‰) and GBW04406 (with a  $\delta^{13}\text{C}$  value of -10.85‰ and a  $\delta^{18}\text{O}$  value of -12.0‰), where  $\delta^{13}\text{C}$  and  $\delta^{18}\text{O}$  values were reported relative to VPDB, both with a SD of 0.2‰.

**Biomarkers.** Hydrocarbon extraction and biomarker analysis were performed at the KLPG. All analyses were performed on fresh drill-core material, drilled with fresh water as drilling fluid as described above. Our biomarker analysis was conducted as described (1, 3). However, in addition, we performed biomarker analysis both on the outside surfaces and inside sections of core material as described in ref. 5. Specifically, three samples with different contents of iron were collected and cut by using a Husqvarna TS350E core cutter and a ISOMET1000 precise

cutting machine. Deionized water was used as lubricant to avoid contamination, and this was exchanged between samples. After cutting, both interior and exterior samples were crushed to powders and extracted.

Here, we focused on the alkylated trimethyl benzenes with fragment ion  $m/z$  134 as the base peak. Among this fraction, we identified clear peaks for C13 to C23-2,3,6-TMAIs with the main peak of C18 and C19 as shown in Fig. S7. The reproducibility of the lower carbon number peaks was somewhat inconsistent in comparing inside and outside samples, and we took this to reflect volatility of these lower-molecular-weight compounds during sample extraction and measurement. In contrast, all inside and outside samples had nearly identical peaks for carbon numbers of C17 and higher, suggesting that these molecules were indigenous to the sample.

The 2,3,6-TMAIs were derived as the breakdown products of, ultimately, carotenoid pigments associated with brown strains of GSB (*Chlorobiaceae*) (6), themselves, anoxygenic phototrophic bacteria. Thus, the presence of 2,3,6-TMAIs indicated the presence of anoxygenic phototrophs in the ecosystem at the time of unit 5 deposition (see main text for further details). Although the concentrations we measured were low compared with other units in the Xiamaling Formation, they were much too high to arise from laboratory air exposure contamination during sample processing (7) as explored in ref. 1. These biomarkers were also absent from Jurassic sediments overlying the Xiamaling Formation (3), adding support to our conclusion that they were indigenous to unit 5 sediments.

1. Wang X, et al. (2017) Oxygen, climate and the chemical evolution of a 1400 million year old tropical marine setting. *Am J Sci* 317:860–899.
2. Croudace IW, Rindby A, Rothwell RG (2006) ITRAX: Description and evaluation of a new multi-function X-ray core scanner. *Geol Soc Lond Spec Publ* 267:51–63.
3. Zhang S, et al. (2017) The oxic degradation of sedimentary organic matter 1.4 Ga constrains atmospheric oxygen levels. *Biogeosciences* 14:2133–2149.
4. Lafargue E, Marquis F, Pillot D (1998) Rock-Eval 6 applications in hydrocarbon exploration, production, and soil contamination studies. *Rev Inst Fr Pet* 53:421–437.
5. French KL, et al. (2015) Reappraisal of hydrocarbon biomarkers in Archean rocks. *Proc Natl Acad Sci USA* 112:5915–5920.
6. Brocks JJ, Summons RE (2004) Sedimentary hydrocarbons, biomarkers for early life. *Treatise on Geochemistry, Biogeochemistry*, eds Holland HD, Turekian KK (Elsevier, Amsterdam), Vol 8, pp 64–115.
7. Illing CJ, Hallmann C, Miller KE, Summons RE, Strauss H (2014) Airborne hydrocarbon contamination from laboratory atmospheres. *Org Geochem* 76:26–38.

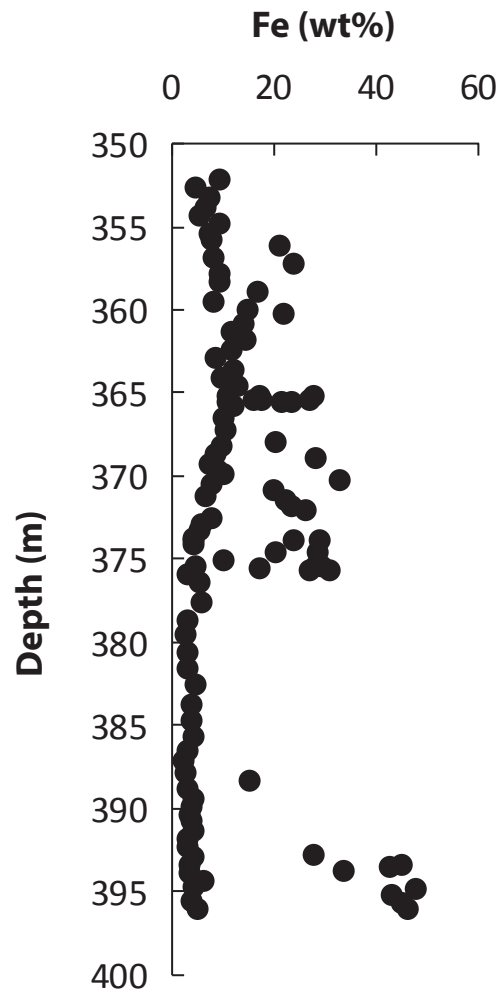

Fig. S1. Total Fe for the full depth of Xiamaling Formation unit 5.

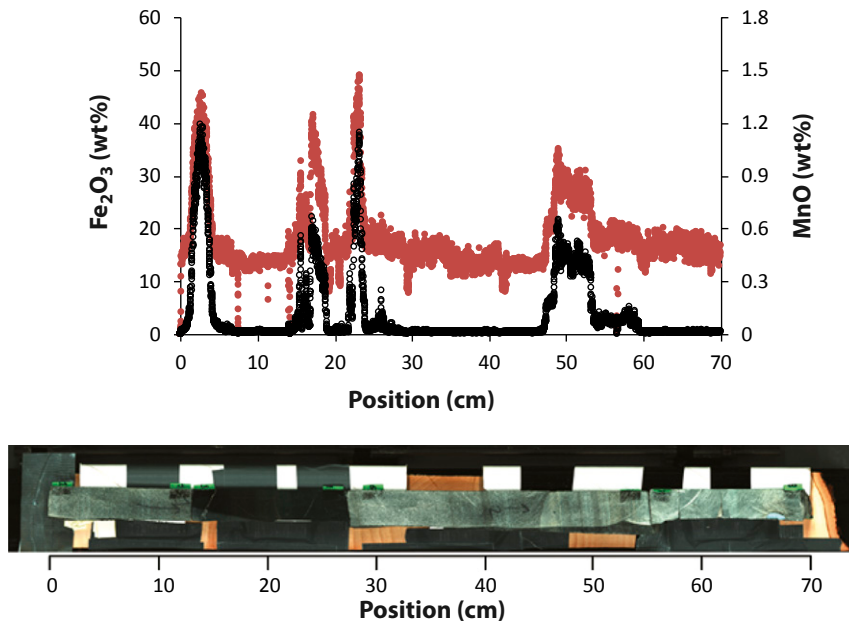

Fig. S2.  $\mu$ XRF results for the uppermost Fe-rich layer of Xiamaling Formation unit 5. Shown also is a photo of the scanned section, where the interval between 12 and 27 cm was polished to a higher degree and thereby is darker than the rest of the core section.



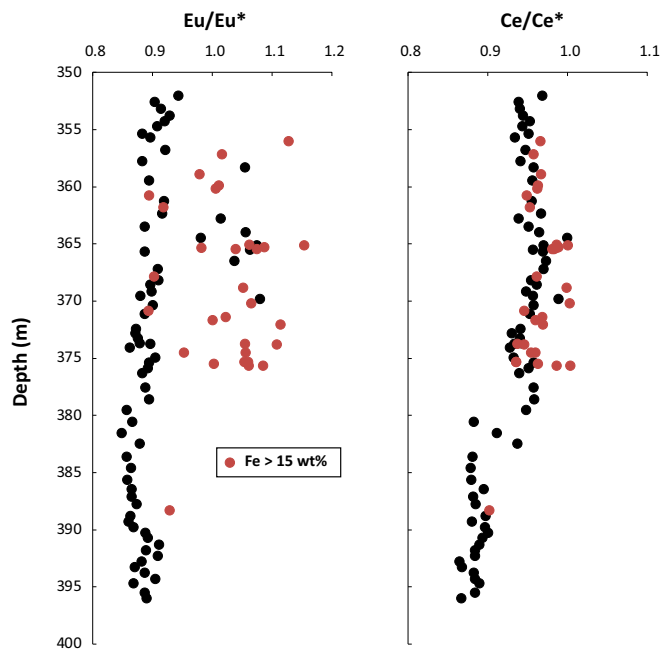

**Fig. S4.** Eu and Ce anomalies for unit 5 of the Xiamaling Formation. Samples with a total Fe content of >15 wt% are shown in red. The Eu anomaly ( $\text{Eu}/\text{Eu}^*$ ) was calculated from NASC-normalized values as  $\text{Eu}/0.5*(\text{Sm}+\text{Gd})$ , while the Ce anomaly was calculated as  $\text{Ce}/0.5(\text{La}+\text{Pr})$  following ref. 1.

1. Bau M, Dulski P (1996) Distribution of yttrium and rare-earth elements in the Penge and Kuruman iron-formations, Transvaal Supergroup, South Africa. *Precambrian Res* 79:37–55.

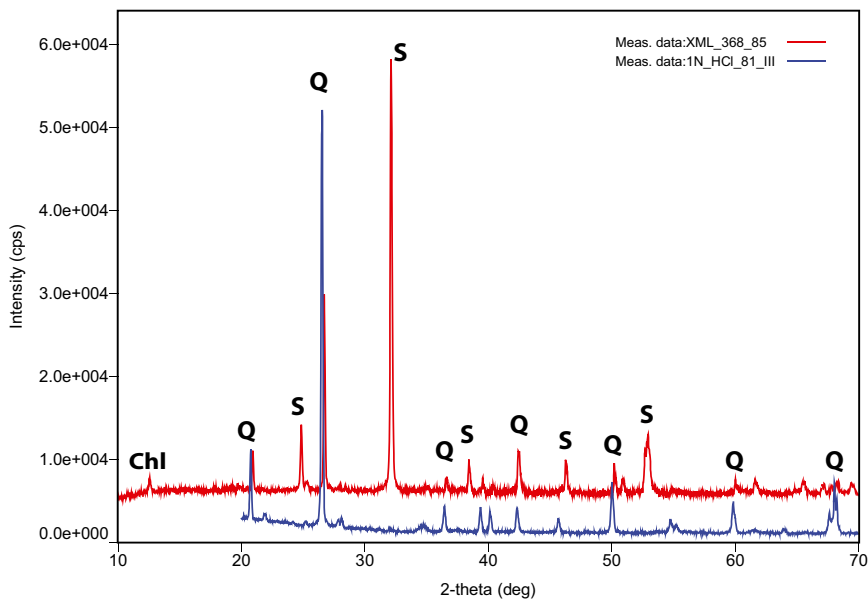

**Fig. S5.** XRD spectra of iron-rich interval from 368.86 m before and after acid treatment. Chl, chlorite; Q, quartz; S, siderite.

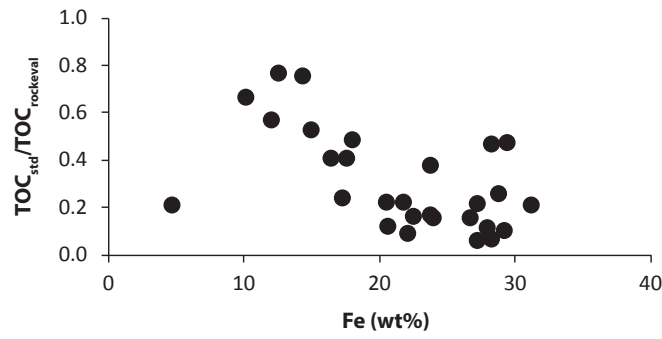

Fig. S6. Ratio of TOC measured by standard techniques (LECO; *Materials and Methods*) to TOC measured by Rock Eval vs. total Fe concentration.

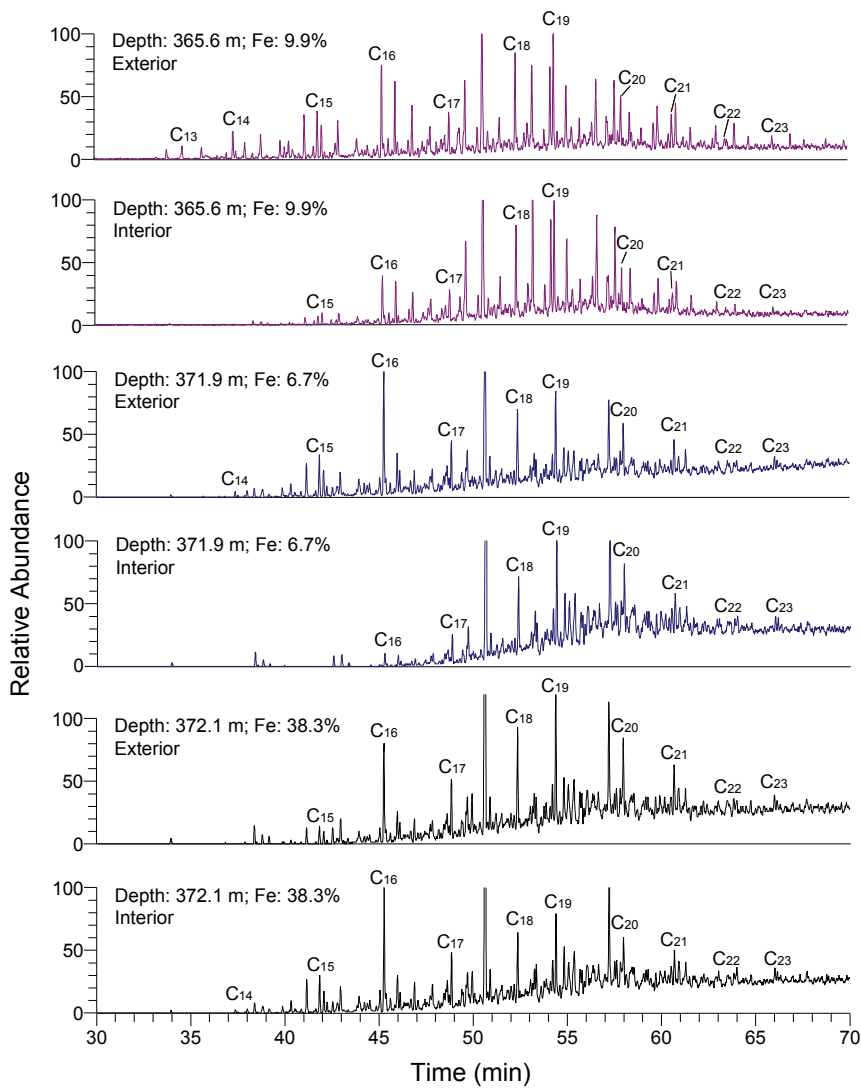

Fig. S7. GC-MS chromatograms ( $m/z$  134) for the aromatic fraction of various depths in the Xiamaling Formation unit 5 for both inside and outside core sections.

Table S1. Geochemical data for unit 5 of the Xiamaling formation

| Depth, m | TOC-whole rock, wt% | $\delta^{13}\text{C-carb}$ , per mil | $\delta^{18}\text{O-carb}$ , per mil | $\delta^{13}\text{C-kerogen}$ , per mil | $\delta^{15}\text{N-kerogen}$ , per mil | Tmax, °C | HI, mg/g TOC | OI, mg/g TOC | Al, wt% | Si, wt% | Fe, wt% | Mn, wt% | V, ppm | Mo, ppm |
|----------|---------------------|--------------------------------------|--------------------------------------|-----------------------------------------|-----------------------------------------|----------|--------------|--------------|---------|---------|---------|---------|--------|---------|
| 352.05   | 0.04                |                                      |                                      |                                         |                                         |          | 150          | 225          | 7.72    | 26.9    | 9.60    | 0.008   | 216    | 0.29    |
| 352.60   | 0.21                |                                      |                                      | -32.1                                   | 6.32                                    | 453      | 90           | 52           | 8.50    | 29.5    | 4.90    | 0.009   | 203    | 0.46    |
| 353.20   | 0.12                |                                      |                                      | -32.3                                   | 6.25                                    | 462      | 83           | 67           | 7.20    | 29.0    | 7.80    | 0.013   | 219    | 0.32    |
| 353.80   | 0.16                |                                      |                                      | -32.3                                   | 6.25                                    | 460      | 75           | 75           | 7.44    | 29.3    | 6.93    | 0.027   | 170    | 0.30    |
| 354.30   | 0.19                |                                      |                                      | -32.5                                   | 6.87                                    | 461      | 89           | 47           | 7.20    | 30.7    | 5.72    | 0.012   | 198    | 0.33    |
| 354.70   | 0.21                |                                      |                                      | -32.5                                   | 6.87                                    | 454      | 81           | 48           | 7.10    | 27.5    | 9.85    | 0.012   | 165    | 0.37    |
| 355.35   | 0.17                |                                      |                                      | -32.3                                   | 6.47                                    | 454      | 94           | 65           | 7.26    | 29.4    | 7.66    | 0.010   | 199    | 0.28    |
| 355.70   | 0.17                |                                      |                                      | -32.3                                   | 6.47                                    | 458      | 71           | 41           | 7.42    | 28.8    | 7.98    | 0.019   | 167    | 0.25    |
| 356.05   |                     |                                      |                                      |                                         |                                         | 446      |              | 171          | 2.52    | 19.8    | 21.52   | 0.561   | 141    | 0.29    |
| 356.80   | 0.17                |                                      |                                      | -31.9                                   | 6.32                                    | 454      | 100          | 53           | 6.73    | 29.5    | 8.62    | 0.009   | 183    | 0.28    |
| 357.15   | 0.10                | -11.70                               | -4.40                                | -32.7                                   | 5.94                                    | 444      | 21           | 221          | 3.13    | 16.8    | 24.00   | 0.909   | 102    | 0.23    |
| 357.80   | 0.14                |                                      |                                      | -32.7                                   | 6.05                                    | 459      | 79           | 93           | 7.25    | 27.9    | 9.87    | 0.018   | 151    | 0.32    |
| 358.30   | 0.63                |                                      |                                      | -33.4                                   | 6.05                                    | 434      | 259          | 17           | 4.63    | 31.7    | 9.78    | 0.012   | 267    | 0.26    |
| 358.90   | 0.09                | -19.50                               | -6.60                                | -33.4                                   | 6.05                                    | 492      | 22           | 225          | 3.98    | 23.2    | 17.26   | 0.236   | 118    | 0.19    |
| 359.45   | 0.20                |                                      |                                      | -32.7                                   | 6.71                                    | 465      | 80           | 50           | 6.42    | 30.4    | 8.36    | 0.009   | 182    | 0.24    |
| 359.90   |                     |                                      |                                      | -31.1                                   | 6.83                                    | 440      | 133          | 137          | 4.88    | 25.6    | 15.15   | 0.142   | 166    | 0.42    |
| 360.15   | 0.06                | -21.00                               | -7.10                                | -32.3                                   | 5.73                                    | 500      | 8            | 186          | 3.32    | 17.9    | 22.10   | 0.413   | 108    | 0.18    |
| 360.80   | 0.12                |                                      |                                      | -32.3                                   | 5.73                                    | 462      | 50           | 244          | 6.21    | 25.4    | 14.39   | 0.094   | 124    | 0.53    |
| 361.25   | 0.14                |                                      |                                      | -32.4                                   | 5.49                                    | 475      | 56           | 206          | 6.46    | 27.1    | 12.19   | 0.065   | 153    | 0.23    |
| 361.80   | 0.14                |                                      |                                      | -32.7                                   | 5.48                                    | 463      | 41           | 211          | 5.80    | 24.3    | 14.98   | 0.149   | 129    | 0.22    |
| 362.38   | 0.08                |                                      |                                      | -33.1                                   | 5.48                                    | 463      | 54           | 179          | 5.59    | 27.5    | 12.05   | 0.115   | 149    | 0.22    |
| 362.80   |                     |                                      |                                      | -33.1                                   | 5.48                                    | 448      | 88           | 275          | 3.69    | 34.1    | 9.05    | 0.010   | 175    | 0.34    |
| 363.50   |                     |                                      |                                      | -33.1                                   | 5.48                                    | 467      | 76           | 47           | 6.51    | 27.7    | 12.34   | 0.006   | 147    | 0.23    |
| 364.02   |                     |                                      |                                      | -33.1                                   | 6.49                                    | 440      | 153          | 132          | 4.87    | 30.7    | 10.15   | 0.015   | 319    | 0.26    |
| 364.50   |                     |                                      |                                      | -33.3                                   | 5.41                                    | 503      | 91           | 109          | 5.82    | 28.0    | 13.41   | 0.008   | 182    | 0.22    |
| 365.10   | 0.10                | -19.00                               | -8.10                                | -33.3                                   | 5.41                                    | 505      | 32           | 160          | 5.29    | 20.3    | 17.59   | 0.169   | 352    | 0.19    |
| 365.12   | 0.11                | -27.00                               | -5.90                                | -32.9                                   | 5.72                                    | 505      | 10           | 172          | 1.74    | 11.9    | 27.99   | 0.481   | 97     | 0.16    |
| 365.15   |                     |                                      |                                      | -32.9                                   | 5.72                                    | 439      | 124          | 153          | 4.32    | 31.4    | 11.39   | 0.019   | 221    | 0.29    |
| 365.31   | 0.22                | -17.30                               | -7.30                                | -33.4                                   | 7.40                                    | 445      | 11           | 179          | 1.96    | 12.6    | 27.20   | 0.501   | 97     | 0.16    |
| 365.35   | 0.19                | -17.10                               | -7.90                                | -33.4                                   | 7.40                                    | 495      | 38           | 138          | 4.71    | 22.8    | 16.43   | 0.191   | 210    | 0.25    |
| 365.40   | 0.29                | -20.60                               | -7.30                                | -33.1                                   | 7.26                                    | 498      | 40           | 127          | 4.13    | 21.2    | 18.03   | 0.253   |        |         |
| 365.45   | 0.14                | -20.40                               | -6.20                                | -32.9                                   | 7.46                                    | 468      | 14           | 224          | 3.27    | 18.3    | 21.80   | 0.363   | 157    | 0.17    |
| 365.47   | 0.10                | -20.90                               | -6.60                                | -32.8                                   | 6.19                                    | 501      | 15           | 222          | 3.73    | 15.5    | 23.76   | 0.385   | 159    | 0.17    |
| 365.50   |                     |                                      |                                      | -33.1                                   | 4.84                                    | 444      | 89           | 137          | 4.96    | 29.7    | 11.11   | 0.038   | 275    | 0.23    |
| 365.70   | 0.14                |                                      |                                      | -32.8                                   | 6.19                                    | 466      | 53           | 205          | 6.43    | 26.9    | 12.56   | 0.067   | 180    | 0.30    |
| 366.50   |                     |                                      |                                      | -33.1                                   | 4.84                                    | 508      | 74           | 78           | 5.17    | 29.8    | 10.47   | 0.029   | 282    | 0.24    |
| 367.20   | 0.09                | -10.90                               | -4.90                                | -32.5                                   | 6.70                                    | 460      | 95           | 55           | 6.55    | 28.3    | 11.01   | 0.008   | 211    | 0.28    |
| 367.85   | 0.13                |                                      |                                      | -32.5                                   | 6.70                                    | 460      | 17           | 261          | 4.94    | 20.1    | 20.51   | 0.320   | 115    | 0.81    |
| 368.18   | 0.16                |                                      |                                      | -32.5                                   | 6.70                                    | 455      | 55           | 170          | 7.11    | 27.5    | 10.15   | 0.071   | 198    | 0.28    |
| 368.60   | 0.08                | -10.30                               | -2.90                                | -32.6                                   | 7.29                                    | 458      | 81           | 169          | 6.79    | 29.1    | 8.95    | 0.035   | 200    | 0.24    |
| 368.85   | 0.08                |                                      |                                      | -32.6                                   | 7.29                                    | 460      | 7            | 152          | 1.98    | 12.3    | 28.29   | 0.675   | 97     | 0.21    |
| 369.20   | 0.14                |                                      |                                      | -32.6                                   | 7.29                                    | 450      | 114          | 71           | 7.11    | 30.1    | 7.68    | 0.008   | 161    | 0.49    |
| 369.55   | 0.19                |                                      |                                      | -32.6                                   | 7.29                                    | 470      | 74           | 21           | 6.86    | 28.4    | 9.34    | 0.007   | 190    | 0.25    |
| 369.85   |                     |                                      |                                      | -32.6                                   | 7.29                                    | 470      | 85           | 100          | 4.97    | 30.8    | 10.43   | 0.008   | 209    | 0.27    |
| 370.19   |                     |                                      |                                      | -32.6                                   | 7.29                                    | 460      | 5            | 137          | 1.13    | 7.9     | 33.29   | 0.718   | 58     | 0.15    |











**Table S3. Biomarker data for the Xiamaling formation unit 5**

| Depth, m | TOC, % | TMAI- C18, $\mu\text{g/g}$ TOC | TMAI-C19, $\mu\text{g/g}$ TOC | TMAI- C18, ng/g rock | TMAI-C19, ng/g rock |
|----------|--------|--------------------------------|-------------------------------|----------------------|---------------------|
| 353.80   | 0.16   | 0.07                           | 0.07                          | 0.11                 | 0.11                |
| 354.70   | 0.21   |                                |                               |                      |                     |
| 355.70   | 0.17   | 0.27                           | 0.32                          | 0.46                 | 0.55                |
| 356.80   | 0.17   |                                |                               |                      |                     |
| 357.80   | 0.14   | 0.10                           | 0.10                          | 0.15                 | 0.14                |
| 358.90   | 0.40   | 0.16                           | 0.16                          | 0.65                 | 0.63                |
| 359.90   | 0.43   |                                |                               |                      |                     |
| 360.80   | 0.16   | 0.11                           | 0.10                          | 0.18                 | 0.17                |
| 361.80   | 0.27   | 0.05                           | 0.05                          | 0.14                 | 0.14                |
| 362.80   | 0.08   |                                |                               |                      |                     |
| 363.50   | 0.17   | 0.09                           | 0.12                          | 0.15                 | 0.20                |
| 364.50   | 0.11   | 0.25                           | 0.28                          | 0.27                 | 0.31                |
| 365.10   | 0.25   | 0.18                           | 0.26                          | 0.45                 | 0.66                |
| 365.15   | 0.17   |                                |                               |                      |                     |
| 365.35   | 0.47   | 0.10                           | 0.07                          | 0.47                 | 0.33                |
| 365.45   | 0.63   | 0.04                           | 0.03                          | 0.26                 | 0.22                |
| 365.50   | 0.19   | 0.43                           | 0.49                          | 0.82                 | 0.93                |
| 365.70   | 0.19   | 0.04                           | 0.03                          | 0.07                 | 0.06                |
| 367.20   | 0.20   | 0.09                           | 0.08                          | 0.17                 | 0.16                |
| 368.60   | 0.16   | 0.04                           | 0.05                          | 0.07                 | 0.08                |
| 369.55   | 0.19   | 0.06                           | 0.08                          | 0.11                 | 0.15                |
| 370.40   | 0.17   | 0.05                           | 0.05                          | 0.09                 | 0.08                |
| 371.15   | 0.31   | 0.06                           | 0.06                          | 0.19                 | 0.18                |
| 372.45   | 0.14   | 0.43                           | 0.49                          | 0.61                 | 0.68                |
| 373.70   | 0.26   | 0.52                           | 0.51                          | 1.35                 | 1.32                |
| 373.75   | 0.88   | 0.06                           | 0.06                          | 0.49                 | 0.56                |
| 374.10   | 0.21   | 0.10                           | 0.11                          | 0.20                 | 0.24                |
| 374.50   | 0.89   | 0.06                           | 0.08                          | 0.55                 | 0.68                |
| 374.97   | 0.22   | 0.23                           | 0.28                          | 0.50                 | 0.62                |
| 375.35   | 1.17   | 0.02                           | 0.02                          | 0.18                 | 0.19                |
| 375.40   | 0.15   | 0.42                           | 0.57                          | 0.63                 | 0.85                |
| 375.50   | 0.44   | 0.25                           | 0.33                          | 1.10                 | 1.47                |
| 375.65   | 1.14   | 0.03                           | 0.03                          | 0.31                 | 0.37                |
| 375.90   | 0.22   | 0.11                           | 0.08                          | 0.24                 | 0.17                |
| 376.30   | 0.19   | 0.05                           | 0.04                          | 0.10                 | 0.07                |
| 378.60   | 0.28   | 0.10                           | 0.07                          | 0.27                 | 0.19                |
| 380.55   | 0.34   | 0.18                           | 0.16                          | 0.62                 | 0.54                |
| 382.50   | 0.21   | 8.21                           | 8.20                          | 17.24                | 17.23               |
| 384.60   | 0.32   | 0.18                           | 0.15                          | 0.57                 | 0.48                |
| 386.45   | 0.35   | 0.16                           | 0.14                          | 0.56                 | 0.49                |
| 387.77   | 0.54   | 0.38                           | 0.26                          | 2.03                 | 1.40                |
| 388.80   | 0.66   | 0.36                           | 0.30                          | 2.36                 | 1.96                |
| 389.80   | 0.56   | 0.32                           | 0.26                          | 1.79                 | 1.45                |
| 390.70   | 0.50   | 0.41                           | 0.34                          | 2.06                 | 1.71                |
| 391.80   | 0.54   | 0.55                           | 0.46                          | 2.97                 | 2.50                |
| 392.80   | 0.36   | 0.34                           | 0.31                          | 1.22                 | 1.10                |
| 393.80   | 0.64   | 0.42                           | 0.35                          | 2.70                 | 2.22                |
| 394.70   | 0.69   | 0.45                           | 0.36                          | 3.12                 | 2.46                |
| 395.50   | 0.57   | 0.49                           | 0.41                          | 2.80                 | 2.32                |
